| Genus                  | Species                                  | Short abbreviation | Strain       | Collection number | BHIB | BHIA |    |    |    |    |    |  |
|------------------------|------------------------------------------|--------------------|--------------|-------------------|------|------|----|----|----|----|----|--|
|                        |                                          |                    |              |                   | 18°C | 4    | 10 | 18 | 25 | 30 | 37 |  |
| <b>Gram-negative</b>   |                                          |                    |              |                   |      |      |    |    |    |    |    |  |
| <i>Shewanella</i>      | <i>Shewanella baltica</i>                | Shebal             | TMP1         | BIM B – 1565      | 3    | 4    | 4  | 2  | 1  | 1  |    |  |
|                        |                                          |                    | TMP5         | BIM B – 1557      | 3    | 4    | 4  | 2  | 1  | 2  |    |  |
|                        |                                          |                    | TMP11        | BIM B – 1561      | 3    | 4    | 4  | 2  | 1  | 2  |    |  |
|                        |                                          |                    | TMP14        | BIM B – 1563      | 3    | 4    | 4  | 2  | 1  | 1  |    |  |
| <i>Acinetobacter</i>   | <i>Acinetobacter lwoffii</i>             | Acilwo             | TMP6         | BIM B – 1558      | 3    | 16   | 4  | 2  | 1  | 2  | 3  |  |
| <i>Pseudomonas</i>     | <i>Pseudomonas lundensis</i>             | Pselun             | TMP2         | BIM B – 1554      | 3    | 4    | 4  | 2  | 1  | 1  | 3  |  |
|                        |                                          |                    | TMP3         | BIM B – 1555      | 3    | 4    | 4  | 2  | 1  | 1  | 3  |  |
|                        |                                          |                    | TMP4         | BIM B – 1556      | 3    | 4    | 4  | 2  | 1  | 1  | 3  |  |
|                        | <i>Pseudomonas leptonychotis</i>         | Pselep             | TMP7         | BIM B – 1559      | 3    | 6    | 4  | 3  | 3  | 4  |    |  |
|                        |                                          |                    | TMP18        | BIM B – 1568      | 3    | 6    | 3  | 3  | 3  | 2  |    |  |
|                        |                                          |                    | TMP19        | BIM B – 1566      | 3    | 6    | 3  | 3  | 3  | 4  |    |  |
|                        | <i>Pseudomonas peli</i>                  | Psepel             | TMP9         | BIM B – 1560      | 3    | 9    | 4  | 3  | 3  |    |    |  |
|                        |                                          |                    | TMP17        | BIM B – 1569      | 3    | 6    | 5  | 3  | 3  |    |    |  |
|                        |                                          |                    | TMP20        | BIM B – 1546      | 3    | 9    | 4  | 3  | 3  |    |    |  |
|                        |                                          |                    | TMP22        | BIM B – 1552      | 3    | 6    | 4  | 4  | 3  |    |    |  |
| TMP25                  |                                          |                    | BIM B – 1542 | 3                 | 6    | 5    | 5  | 3  |    |    |    |  |
| TMP26                  | BIM B – 1548                             | 3                  | 6            | 4                 | 3    | 3    |    |    |    |    |    |  |
| <i>Flavobacterium</i>  | <i>Flavobacterium degerlachei</i>        | Fladeg             | TMP13        | BIM B – 1562      | 3    | 6    | 5  | 5  | 3  |    |    |  |
| <b>Gram-positive</b>   |                                          |                    |              |                   |      |      |    |    |    |    |    |  |
| <i>Sporosarcina</i>    | <i>Sporosarcina</i> sp.                  | Sposp              | TMP10        | BIM B – 1539      | 3    | 6    | 4  | 3  | 3  | 2  |    |  |
| <i>Carnobacterium</i>  | <i>Carnobacterium funditum</i>           | Carfun*            | TMP27        | BIM B – 1541      | 3    | 6    | 5  | 5  |    |    |    |  |
|                        | <i>Carnobacterium iners</i>              | Carine*            | TMP28        | BIM B – 1544      | 3    | 9    | 4  | 5  |    |    |    |  |
|                        | <i>Carnobacterium inhibens</i>           | Carinh             | TMP12        | BIM B – 1540      | 3    | 6    | 7  | 4  | 2  | 2  |    |  |
| <i>Facklamia</i>       | <i>Facklamia tabacinasalis</i>           | Factab             | TMP29        | BIM B – 1577      | 3    |      | 5  | 5  | 4  | 4  |    |  |
| <i>Arthrobacter</i>    | <i>Arthrobacter alpinus</i>              | Artalp             | TMP15        | BIM B – 1549      | 3    | 4    | 4  | 3  | 3  |    |    |  |
|                        | <i>Arthrobacter agilis</i>               | Artagi             | TMP24        | BIM B – 1543      | 3    | 9    | 6  | 3  | 4  |    |    |  |
| <i>Brachybacterium</i> | <i>Brachybacterium paraconglomeratum</i> | Brapar             | TMP16        | BIM B – 1571      | 3    |      | 5  | 4  | 3  | 2  | 3  |  |
| <i>Micrococcus</i>     | <i>Micrococcus luteus</i>                | Miclut             | TMP21        | BIM B – 1545      | 3    |      | 6  | 3  | 3  | 1  | 3  |  |
| <i>Agrococcus</i>      | <i>Agrococcus citreus</i>                | Agrcit             | TMP23        | BIM B – 1547      | 3    |      |    |    | 4  |    |    |  |
| <i>Leifsonia</i>       | <i>Leifsonia</i> sp.                     | Leisp              | TMP30        | BIM B – 1567      | 3    | 8    | 5  | 4  | 4  |    |    |  |
